# Supplementary material for: Design of Stacked Multilayer Aperture Coupled Millimeter-wave Circular Array Antenna for 5G Femtobase stations
Source: Research Square preprint supplement (doi:10.21203/rs.3.rs-1426053/v1), 2023-03-01
Supplement: Supplementary file 1 [file 2108e7c85599b27643555d61.docx]

**
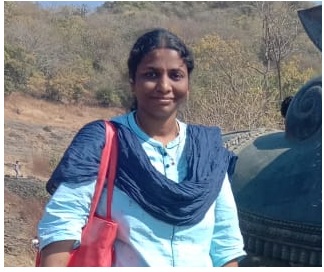
V.Harini** pursuing PhD in Antennas from JNTUK, Kakinada, Andhra Pradesh, India. She is currently working as Assistant Professor in the Department of ECE, Vardhaman College of Engineering, Hyderabad. She received B.Tech degree in ECE from JNTU Hyderabad, Telangana, in 2008 and M. Tech degree in Communication Engineering from VIT University, Vellore, Tamil Nadu, India in 2010. Her research areas include wireless communications, 5G Communications, Femtocells and mm wave microstrip antennas and array antennas.

**M.V.S. Sairam** is a Professor and Head, Department of Electronics and Communication Engineering at G. V. P. College of Engineering (Autonomous), Visakhapatnam, Andhra Pradesh, India. He received the B. E. degree from S. R. K. R. Engineering College (Affiliated to Andhra University), Bhimavaram, Andhra Pradesh in 1996, the M.E. degree from Andhra University, Visakhapatnam in 2002, and the Ph.D. degree from J. N. T. University, Kakinada, Andhra Pradesh in 2010.He is member of IEEE, IE and ISTE. He has several publications in his area of expertise. His research interest includes wireless communications, digital signal processing, error correcting codes, OFDM, and energy efficiency in cognitive radio.

**
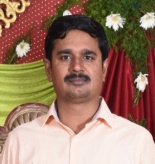
**

**Madhu Ramarakula** received the B.E degree in Electronics & Communication Engineering from Osmania University, Hyderabad, India, in 2003 and M.Tech degree in Communication Systems from Jawaharlal Nehru Technological University Hyderabad, India, in 2009 and Ph.D degree in Electronics & Communication Engineering from Andhra University, Visakhapatnam, India, in 2014. He is presently working as an Assistant Professor in the Department of Electronics & Communication Engineering, University College of Engineering Kakinada (A), JNTUK Kakinada, India. He has 10 years of teaching experience. He has published more than 30 research papers in various reputed national and international Journals and conferences. His research interests include Mobile communications, satellite communications and GPS. He is a member of IEEE.
